# Supplementary material for: Macrocycle based dinuclear dysprosium(iii) single molecule magnets with localD5hcoordination geometry
Source: Royal Society of Chemistry journal article supplement (doi:10.1039/d1dt02815d), 2021-01-01
Supplement: d1dt02815d1.pdf [file d1dt02815d1.pdf]

# Macrocycle Based Dinuclear Dysprosium(III) Single Molecule Magnets with Local $D_{5h}$ Coordination Geometry

Jianfeng Wu,<sup>a,b</sup> Serhiy Demeshko,<sup>a</sup> Sebastian Dechert,<sup>a</sup> and Franc Meyer<sup>\*,a</sup>

<sup>a</sup> Institut für Anorganische Chemie, Universität Göttingen, Tammannstr. 4, D-37077 Göttingen, Germany.

<sup>b</sup> School of Chemistry and Chemical Engineering, Northwestern Polytechnical University, Xi'an 710072, P. R. China

|                                                                  |     |
|------------------------------------------------------------------|-----|
| 1. Schematic drawing of the ligands                              | S2  |
| 2. IR Spectroscopy                                               | S3  |
| 3. Powder XRD and thermogravimetric analyses                     | S4  |
| 4. Crystallographic Details                                      | S5  |
| 5. Direct current (dc) magnetic susceptibility measurements      | S10 |
| 6. Alternating current (ac) magnetic susceptibility measurements | S12 |
| 7. CC-Fit results                                                | S14 |
| 8. Calculations with Magellan program                            | S18 |
| 9. References                                                    | S19 |

## 1. Schematic drawing of the ligands

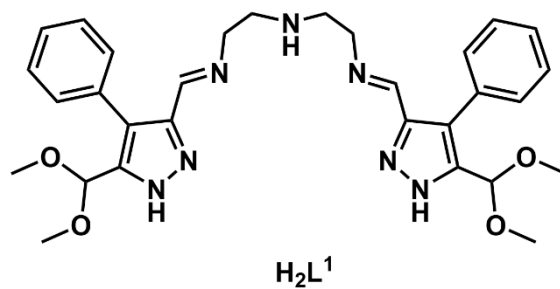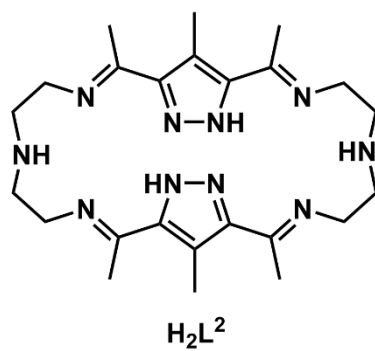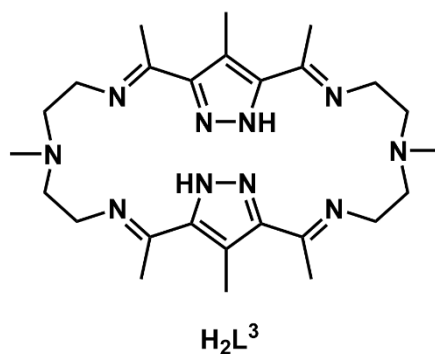

Scheme S1. Schematic drawing of the proligands  $H_2L^1$  (top),  $H_2L^2$  (middle), and  $H_2L^3$  (bottom).

## 2. IR Spectroscopy

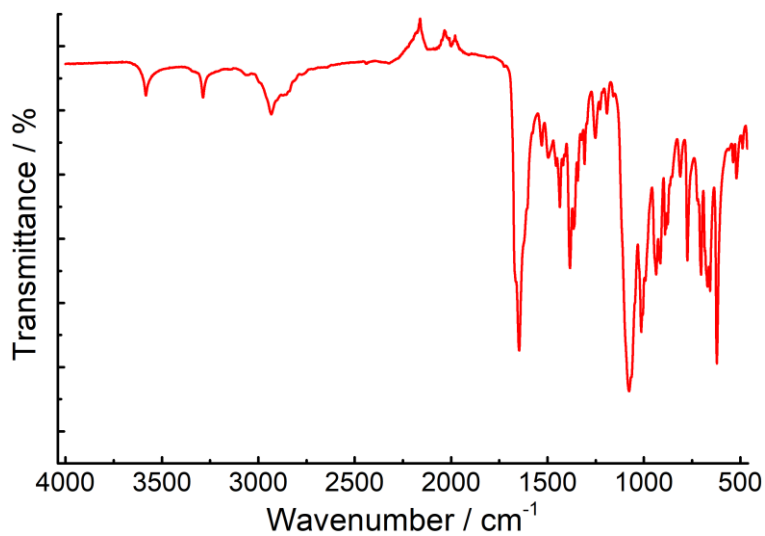

Fig. S1 IR(ATR) spectrum of a solid sample of complex  $\text{Dy}_4$ .

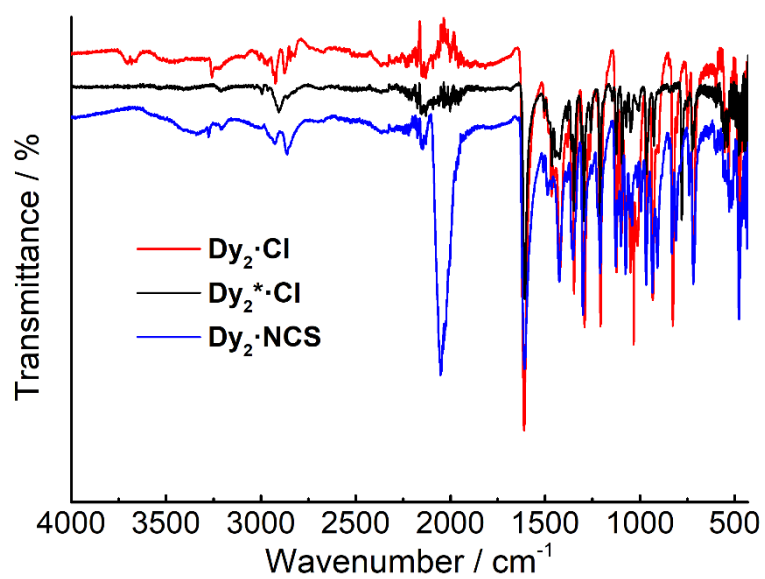

Fig. S2 IR(ATR) spectra of solid samples of complexes  $\text{Dy}_2 \cdot \text{Cl}$ ,  $\text{Dy}_2^* \cdot \text{Cl}$ , and  $\text{Dy}_2 \cdot \text{SCN}$ .

### 3. Powder XRD and thermogravimetric analyses

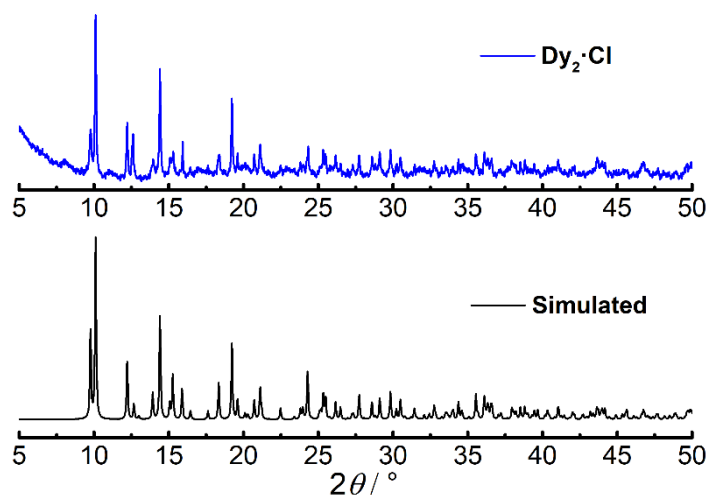

Fig. S3 Powder XRD analysis of  $\text{Dy}_2\cdot\text{Cl}$ . The black line is the simulated pattern based on the single crystal diffraction data.

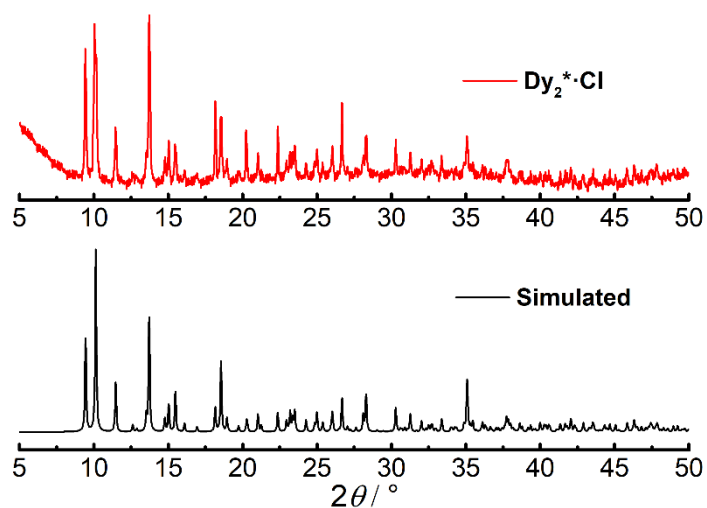

Fig. S4 Powder XRD analysis of  $\text{Dy}_2^*\cdot\text{Cl}$ . The black line is the simulated pattern based on the single crystal diffraction data.

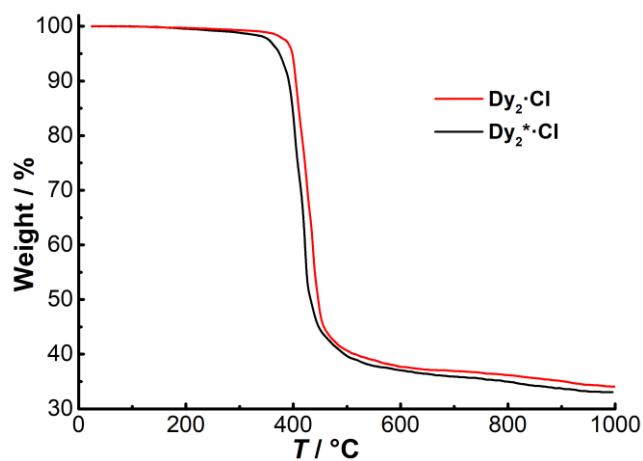

Fig. S5 Thermogravimetric analyses of  $\text{Dy}_2\cdot\text{Cl}$  (red line) and  $\text{Dy}_2^*\cdot\text{Cl}$  (black line).

## 4. Crystallographic Details

Table S1. Crystallographic data of complexes **Dy<sub>4</sub>**, **Dy<sub>2</sub>·Cl**, **Dy<sub>2</sub><sup>\*</sup>·Cl**, and **Dy<sub>2</sub>·SCN**.

|                                                                                      | <b>Dy<sub>4</sub></b>                                                                            | <b>Dy<sub>2</sub>·Cl</b>                                                        | <b>Dy<sub>2</sub><sup>*</sup>·Cl</b>                                            | <b>Dy<sub>2</sub>·SCN</b>                                                                     |
|--------------------------------------------------------------------------------------|--------------------------------------------------------------------------------------------------|---------------------------------------------------------------------------------|---------------------------------------------------------------------------------|-----------------------------------------------------------------------------------------------|
| empirical formula                                                                    | C <sub>72</sub> H <sub>102</sub> Cl <sub>4</sub> Dy <sub>4</sub> N <sub>18</sub> O <sub>32</sub> | C <sub>24</sub> H <sub>36</sub> Cl <sub>4</sub> Dy <sub>2</sub> N <sub>10</sub> | C <sub>26</sub> H <sub>40</sub> Cl <sub>4</sub> Dy <sub>2</sub> N <sub>10</sub> | C <sub>30</sub> H <sub>44</sub> Dy <sub>2</sub> N <sub>14</sub> O <sub>2</sub> S <sub>4</sub> |
| formula weight, g·mol <sup>-1</sup>                                                  | 2523.51                                                                                          | 931.43                                                                          | 959.48                                                                          | 1086.03                                                                                       |
| crystal size, mm <sup>3</sup>                                                        | 0.500 x 0.300 x 0.150                                                                            | 0.210 x 0.180 x 0.160                                                           | 0.160 x 0.150 x 0.100                                                           | 0.210 x 0.080 x 0.050                                                                         |
| crystal system                                                                       | Monoclinic                                                                                       | Monoclinic                                                                      | Monoclinic                                                                      | Triclinic                                                                                     |
| space group                                                                          | <i>P</i> 2 <sub>1</sub> / <i>n</i>                                                               | <i>P</i> 2 <sub>1</sub> / <i>c</i>                                              | <i>P</i> 2 <sub>1</sub> / <i>c</i>                                              | <i>P</i> -1                                                                                   |
| <i>T</i> , K                                                                         | 133(2)                                                                                           | 133(2)                                                                          | 133(2)                                                                          | 133(2)                                                                                        |
| $\lambda$ , Å                                                                        | 0.71073                                                                                          | 0.71073                                                                         | 0.71073                                                                         | 0.71073                                                                                       |
| <i>a</i> , Å                                                                         | 14.0320(2)                                                                                       | 8.9982(3)                                                                       | 8.9524(3)                                                                       | 8.7415(4)                                                                                     |
| <i>b</i> , Å                                                                         | 16.1940(3)                                                                                       | 11.6001(3)                                                                      | 11.7805(5)                                                                      | 9.1291(4)                                                                                     |
| <i>c</i> , Å                                                                         | 25.7815(4)                                                                                       | 14.8941(5)                                                                      | 15.8173(6)                                                                      | 12.9791(5)                                                                                    |
| $\alpha$ , °                                                                         | 90                                                                                               | 90                                                                              | 90                                                                              | 79.287(3)                                                                                     |
| $\beta$ , °                                                                          | 96.4540(10)                                                                                      | 103.545(3)                                                                      | 102.837(3)                                                                      | 73.578(3)                                                                                     |
| $\gamma$ , °                                                                         | 90                                                                                               | 90                                                                              | 90                                                                              | 87.499(4)                                                                                     |
| <i>V</i> , Å <sup>3</sup>                                                            | 5821.31(16)                                                                                      | 1511.41(8)                                                                      | 1626.46(11)                                                                     | 976.15(7)                                                                                     |
| <i>Z</i>                                                                             | 2                                                                                                | 2                                                                               | 2                                                                               | 1                                                                                             |
| $\rho$ (cal), g·cm <sup>-3</sup>                                                     | 1.440                                                                                            | 2.047                                                                           | 1.959                                                                           | 1.847                                                                                         |
| <i>F</i> (000)                                                                       | 2496                                                                                             | 900                                                                             | 932                                                                             | 534                                                                                           |
| $\theta$ range [°]                                                                   | 1.488 to 26.790                                                                                  | 2.250 to 26.855                                                                 | 2.175 to 26.865                                                                 | 1.663 to 26.747                                                                               |
| <i>T</i> <sub>min</sub> / <i>T</i> <sub>max</sub>                                    | 0.8436 / 0.5310                                                                                  | 0.4310 / 0.2492                                                                 | 0.8004 / 0.6557                                                                 | 0.8473 / 0.4952                                                                               |
| measured refl.                                                                       | 84214                                                                                            | 19848                                                                           | 13782                                                                           | 13784                                                                                         |
| unique refl. [ <i>R</i> <sub>int</sub> ]                                             | 12347, 0.0285                                                                                    | 3205 / 0.0239                                                                   | 3450 / 0.0360                                                                   | 4139 / 0.0275                                                                                 |
| goodness-of-fit ( <i>F</i> <sup>2</sup> )                                            | 1.048                                                                                            | 1.115                                                                           | 1.071                                                                           | 1.118                                                                                         |
| data / restr. / param.                                                               | 12347 / 119 / 636                                                                                | 3205 / 0 / 184                                                                  | 3450 / 31 / 241                                                                 | 4139 / 1 / 247                                                                                |
| <i>R</i> <sub>1</sub> , <i>wR</i> <sub>2</sub> ( <i>I</i> > 2 $\sigma$ ( <i>I</i> )) | 0.0235, 0.0569                                                                                   | 0.0248, 0.0589                                                                  | 0.0293, 0.0638                                                                  | 0.0229, 0.0537                                                                                |
| <i>R</i> <sub>1</sub> , <i>wR</i> <sub>2</sub> (all data)                            | 0.0274, 0.0584                                                                                   | 0.0275, 0.0600                                                                  | 0.0400, 0.0668                                                                  | 0.0282, 0.0558                                                                                |
| res. el. dens. [e·Å <sup>-3</sup> ]                                                  | 0.736 / -0.686                                                                                   | 1.257 / -0.717                                                                  | 1.882 / -0.700                                                                  | 1.492 / -0.336                                                                                |

Table S2. Selected bond distances (Å) in complex **Dy<sub>4</sub>**.

|              |            |             |             |
|--------------|------------|-------------|-------------|
| Dy(1)-O(6)   | 2.2608(18) | Dy(2)-O(6)  | 2.2726(19)  |
| Dy(1)-O(5)   | 2.3152(18) | Dy(2)-O(8)  | 2.320(2)    |
| Dy(1)-O(7)   | 2.351(2)   | Dy(2)-O(5)  | 2.3890(18)  |
| Dy(1)-O(5)#  | 2.4034(17) | Dy(2)-N(6)# | 2.411(2)    |
| Dy(1)-N(1)   | 2.424(2)   | Dy(2)-N(2)# | 2.431(2)    |
| Dy(1)-N(7)   | 2.429(2)   | Dy(2)-N(3)# | 2.517(2)    |
| Dy(1)-O(1)   | 2.5179(19) | Dy(2)-N(5)# | 2.531(2)    |
| Dy(1)-O(3)   | 2.5892(19) | Dy(2)-N(4)# | 2.570(2)    |
| Dy(1)-Dy(1)# | 3.8066(2)  | Dy(1)-Dy(2) | 3.72071(18) |

Symmetry transformations used to generate equivalent atoms: # -x+1,-y+1,-z+1.

Table S3. Selected bond angles (°) in complex **Dy<sub>4</sub>**.

|                  |           |                   |           |
|------------------|-----------|-------------------|-----------|
| O(6)-Dy(1)-O(7)  | 82.39(7)  | O(6)-Dy(2)-O(8)   | 98.08(8)  |
| O(5)-Dy(1)-O(7)  | 105.47(7) | O(8)-Dy(2)-O(5)   | 82.54(7)  |
| O(7)-Dy(1)-N(1)  | 78.31(8)  | O(6)-Dy(2)-N(6)#  | 86.75(7)  |
| O(5)#-Dy(1)-N(1) | 74.10(7)  | O(5)-Dy(2)-N(6)#  | 73.90(7)  |
| O(5)-Dy(1)-N(7)  | 80.54(7)  | O(8)-Dy(2)-N(2)#  | 85.35(8)  |
| O(5)#-Dy(1)-N(7) | 75.54(7)  | N(6)#-Dy(2)-N(2)# | 75.44(8)  |
| N(1)-Dy(1)-N(7)  | 75.15(8)  | O(8)-Dy(2)-N(3)#  | 82.04(8)  |
| O(6)-Dy(1)-O(1)  | 85.28(7)  | N(6)#-Dy(2)-N(3)# | 105.55(8) |
| O(7)-Dy(1)-O(1)  | 86.00(7)  | O(6)-Dy(2)-N(5)#  | 84.66(7)  |
| N(7)-Dy(1)-O(1)  | 105.67(7) | N(2)#-Dy(2)-N(5)# | 114.67(8) |
| O(6)-Dy(1)-O(3)  | 78.91(7)  | N(3)#-Dy(2)-N(5)# | 79.15(8)  |
| O(5)-Dy(1)-O(3)  | 82.41(6)  | O(6)-Dy(2)-N(4)#  | 86.46(7)  |
| N(1)-Dy(1)-O(3)  | 109.12(7) | O(8)-Dy(2)-N(4)#  | 76.38(8)  |
| O(1)-Dy(1)-O(3)  | 78.54(7)  | N(2)#-Dy(2)-N(4)# | 129.56(8) |

Symmetry transformations used to generate equivalent atoms: # -x+1,-y+1,-z+1

Table S4. Selected bond distances (Å) and angles (°) in complexes **Dy<sub>2</sub>·Cl**, **Dy<sub>2</sub><sup>\*</sup>·Cl**, and **Dy<sub>2</sub>·SCN**.

| <b>Dy<sub>2</sub>·Cl</b> |            | <b>Dy<sub>2</sub><sup>*</sup>·Cl</b> |            | <b>Dy<sub>2</sub>·SCN</b> |            |
|--------------------------|------------|--------------------------------------|------------|---------------------------|------------|
| Dy(1)-N(1)               | 2.441(3)   | Dy(1)-N(5)                           | 2.447(4)   | Dy(1)-N(6)                | 2.397(3)   |
| Dy(1)-N(2)               | 2.455(3)   | Dy(1)-N(2)                           | 2.452(3)   | Dy(1)-N(7)                | 2.423(3)   |
| Dy(1)-N(5)               | 2.458(3)   | Dy(1)-N(1)                           | 2.453(4)   | Dy(1)-N(1)                | 2.454(3)   |
| Dy(1)-N(3)               | 2.467(3)   | Dy(1)-N(3)                           | 2.469(4)   | Dy(1)-O(1)                | 2.455(3)   |
| Dy(1)-N(4)               | 2.488(4)   | Dy(1)-N(4)                           | 2.547(4)   | Dy(1)-N(2)                | 2.472(3)   |
| Dy(1)-Cl(2)              | 2.6030(11) | Dy(1)-Cl(2)                          | 2.6050(12) | Dy(1)-N(3)                | 2.484(3)   |
| Dy(1)-Cl(1)              | 2.6143(12) | Dy(1)-Cl(1)                          | 2.6123(12) | Dy(1)-N(5)                | 2.486(3)   |
| Cl(2)-Dy(1)-Cl(1)        | 169.18(4)  | Cl(2)-Dy(1)-Cl(1)                    | 174.17(4)  | Dy(1)-N(4)                | 2.550(3)   |
|                          |            |                                      |            | N(6)-Dy(1)-N(7)           | 149.49(10) |
|                          |            |                                      |            | N(7)-Dy(1)-O(1)           | 138.69(9)  |

Table S5. Selected bond angles (°) in complexes **Dy<sub>2</sub>·Cl**, **Dy<sub>2</sub><sup>\*</sup>·Cl**, and **Dy<sub>2</sub>·SCN**.

| <b>Dy<sub>2</sub>·Cl</b> |           | <b>Dy<sub>2</sub><sup>*</sup>·Cl</b> |           | <b>Dy<sub>2</sub>·SCN</b> |            |
|--------------------------|-----------|--------------------------------------|-----------|---------------------------|------------|
| N(1)-Dy(1)-N(2)          | 92.58(10) | N(5)-Dy(1)-N(2)                      | 66.32(13) | N(6)-Dy(1)-N(1)           | 112.19(10) |
| N(2)-Dy(1)-N(5)          | 66.02(11) | N(2)-Dy(1)-N(1)                      | 91.34(11) | N(7)-Dy(1)-N(1)           | 81.24(9)   |
| N(1)-Dy(1)-N(3)          | 66.12(11) | N(1)-Dy(1)-N(3)                      | 66.33(12) | N(6)-Dy(1)-O(1)           | 71.50(9)   |
| N(5)-Dy(1)-N(4)          | 68.46(13) | N(5)-Dy(1)-N(4)                      | 67.26(13) | N(6)-Dy(1)-N(2)           | 127.67(10) |
| N(3)-Dy(1)-N(4)          | 66.81(13) | N(3)-Dy(1)-N(4)                      | 68.76(13) | N(7)-Dy(1)-N(2)           | 76.78(9)   |
| N(1)-Dy(1)-Cl(2)         | 92.58(8)  | N(5)-Dy(1)-Cl(2)                     | 90.98(13) | N(1)-Dy(1)-N(2)           | 91.53(9)   |
| N(2)-Dy(1)-Cl(2)         | 94.97(8)  | N(2)-Dy(1)-Cl(2)                     | 93.43(8)  | N(6)-Dy(1)-N(3)           | 80.86(10)  |
| N(5)-Dy(1)-Cl(2)         | 90.78(9)  | N(1)-Dy(1)-Cl(2)                     | 89.92(9)  | N(7)-Dy(1)-N(3)           | 80.60(10)  |
| N(3)-Dy(1)-Cl(2)         | 88.08(8)  | N(3)-Dy(1)-Cl(2)                     | 86.31(9)  | N(1)-Dy(1)-N(3)           | 65.20(9)   |
| N(4)-Dy(1)-Cl(2)         | 85.43(12) | N(4)-Dy(1)-Cl(2)                     | 88.08(9)  | N(6)-Dy(1)-N(5)           | 90.11(10)  |
| N(1)-Dy(1)-Cl(1)         | 93.73(8)  | N(5)-Dy(1)-Cl(1)                     | 90.22(13) | N(7)-Dy(1)-N(5)           | 84.64(10)  |
| N(2)-Dy(1)-Cl(1)         | 93.53(8)  | N(2)-Dy(1)-Cl(1)                     | 92.28(8)  | N(2)-Dy(1)-N(5)           | 65.31(9)   |

|                  |           |                  |          |                 |           |
|------------------|-----------|------------------|----------|-----------------|-----------|
| N(5)-Dy(1)-Cl(1) | 86.55(9)  | N(1)-Dy(1)-Cl(1) | 91.14(9) | N(6)-Dy(1)-N(4) | 70.54(10) |
| N(3)-Dy(1)-Cl(1) | 86.45(9)  | N(3)-Dy(1)-Cl(1) | 88.86(9) | N(7)-Dy(1)-N(4) | 79.86(10) |
| N(4)-Dy(1)-Cl(1) | 83.83(12) | N(4)-Dy(1)-Cl(1) | 87.12(9) | N(3)-Dy(1)-N(4) | 66.24(9)  |
|                  |           |                  |          | N(5)-Dy(1)-N(4) | 66.46(9)  |

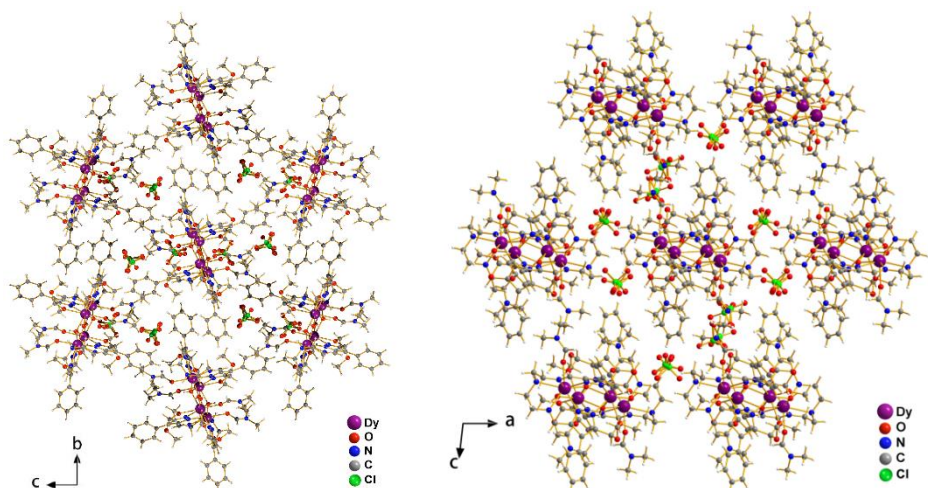

Fig. S6 Packing models along the *a* and *b* axes of complex **Dy<sub>4</sub>**.

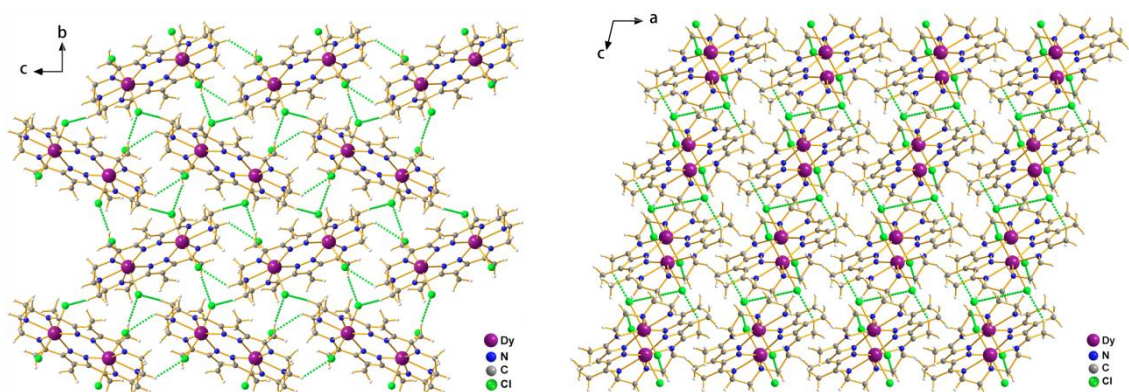

Fig. S7 Packing models along the *a* and *b* axes of complex **Dy<sub>2</sub>·Cl**. The green dash lines represent the hydrogen bondings.

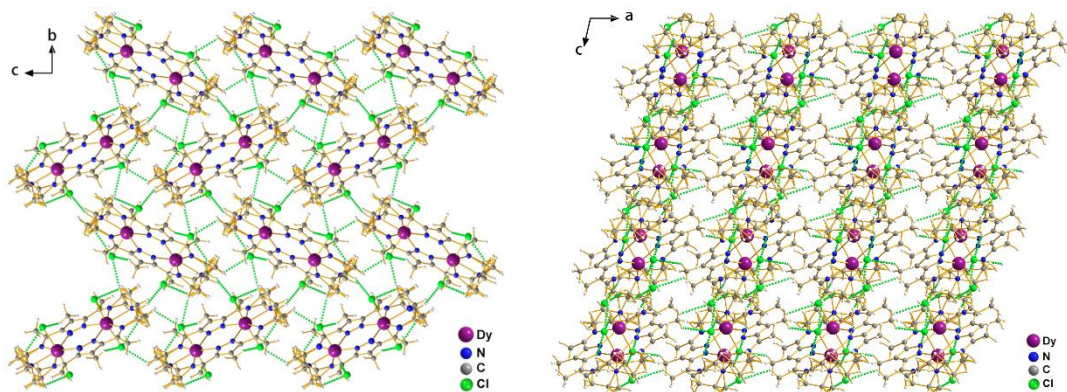

Fig. S8 Packing models along the *a* and *b* axes of complex **Dy<sub>2</sub><sup>\*</sup>·Cl**. The green dash lines represent the hydrogen bondings.

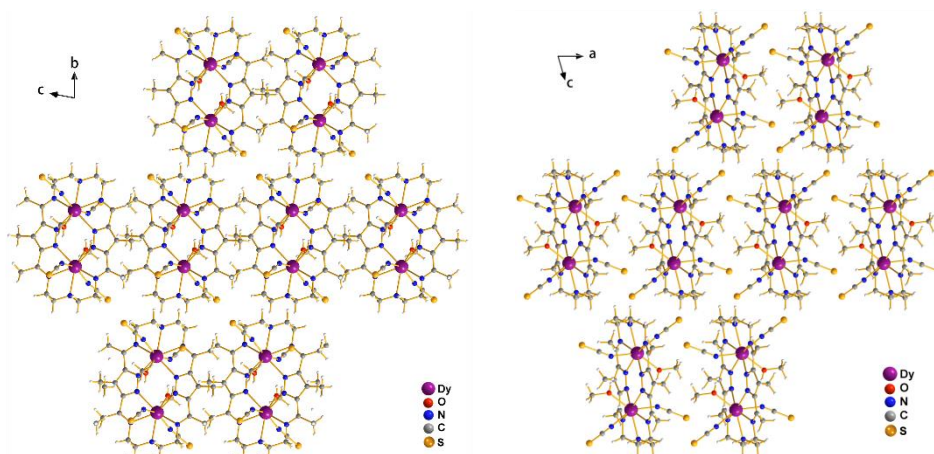

Fig. S9 Packing models along the *a* and *b* axes of complex **Dy<sub>2</sub>·SCN**.

Table S6. *CShM* values calculated by *SHAPE 2.1*<sup>1</sup> for **Dy<sub>4</sub>**.

| Central atom | Coordination Geometry                                            | Dy1          | Dy2          |
|--------------|------------------------------------------------------------------|--------------|--------------|
| Dy           | Cube ( <i>O<sub>h</sub></i> )                                    | 10.878       | 12.616       |
|              | Square antiprism ( <i>D<sub>4d</sub></i> )                       | <b>1.358</b> | 2.900        |
|              | Triangular dodecahedron ( <i>D<sub>2d</sub></i> )                | 2.124        | 2.075        |
|              | Johnson gyrobifastigium J26 ( <i>D<sub>2d</sub></i> )            | 15.159       | 11.704       |
|              | Johnson elongated triangular bipyramid ( <i>D<sub>3h</sub></i> ) | 28.301       | 25.449       |
|              | Biaugmented trigonal prism ( <i>C<sub>2v</sub></i> )             | 2.147        | <b>1.898</b> |
|              | Snub diphenoid J84 ( <i>D<sub>2d</sub></i> )                     | 4.694        | 3.447        |

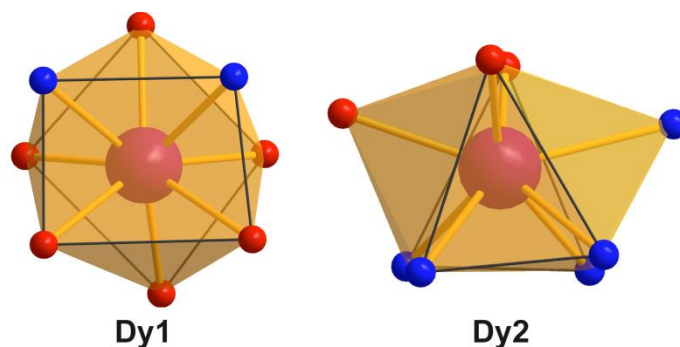

Fig. S10 Coordination polyhedron of Dy1 (left) and Dy2 (right) in complex **Dy<sub>4</sub>**.

Table S7. *CShM* values calculated by *SHAPE 2.1*<sup>1</sup> for **Dy<sub>2</sub>·Cl** and **Dy<sub>2</sub><sup>\*</sup>·Cl**.

| Central atom | Coordination Geometry                                             | <b>Dy<sub>2</sub>·Cl</b> | <b>Dy<sub>2</sub><sup>*</sup>·Cl</b> |
|--------------|-------------------------------------------------------------------|--------------------------|--------------------------------------|
| Dy           | Hexagonal pyramid ( <i>C<sub>6v</sub></i> )                       | 24.940                   | 24.584                               |
|              | Pentagonal bipyramid ( <i>D<sub>5h</sub></i> )                    | <b>0.801</b>             | <b>0.689</b>                         |
|              | Capped octahedron ( <i>C<sub>3v</sub></i> )                       | 8.759                    | 8.143                                |
|              | Capped trigonal prism ( <i>C<sub>2v</sub></i> )                   | 6.947                    | 6.420                                |
|              | Johnson pentagonal bipyramid J13 ( <i>D<sub>5h</sub></i> )        | 5.420                    | 5.268                                |
|              | Johnson elongated triangular pyramid J7 ( <i>C<sub>3v</sub></i> ) | 24.391                   | 23.565                               |



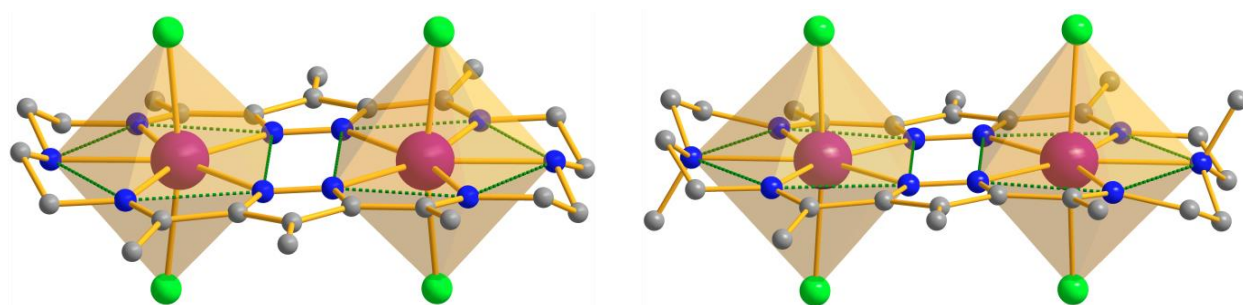

Fig. S11 Coordination polyhedra of the Dy<sup>III</sup> ions in complexes **Dy<sub>2</sub>·Cl** (left) and **Dy<sub>2</sub><sup>\*</sup>·Cl** (right).

Table S8. *CShM* values calculated by *SHAPE 2.1*<sup>1</sup> for **Dy<sub>2</sub>·SCN**.

| Central atom | Coordination Geometry                                            | <b>Dy<sub>2</sub>·SCN</b> |
|--------------|------------------------------------------------------------------|---------------------------|
| Dy           | Cube ( <i>O<sub>h</sub></i> )                                    | 8.776                     |
|              | Square antiprism ( <i>D<sub>4d</sub></i> )                       | 4.194                     |
|              | Triangular dodecahedron ( <i>D<sub>2d</sub></i> )                | <b>2.600</b>              |
|              | Johnson gyrobifastigium J26 ( <i>D<sub>2d</sub></i> )            | 9.308                     |
|              | Johnson elongated triangular bipyramid ( <i>D<sub>3h</sub></i> ) | 26.603                    |
|              | Biaugmented trigonal prism ( <i>C<sub>2v</sub></i> )             | 2.818                     |
|              | Snub diphenooid J84 ( <i>D<sub>2d</sub></i> )                    | 5.724                     |

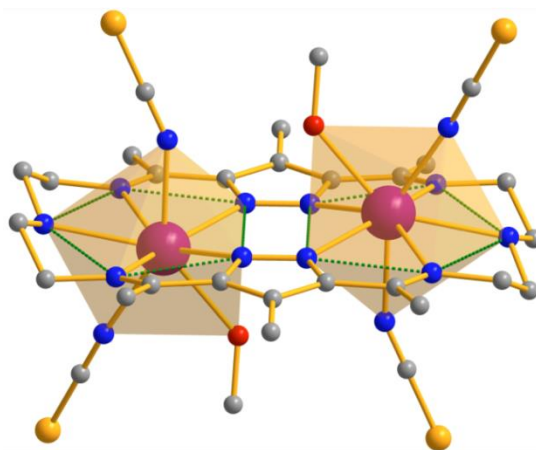

Fig. S12 Coordination polyhedra of the Dy<sup>III</sup> ions in complex **Dy<sub>2</sub>·SCN**.

## 5. Direct current (dc) magnetic susceptibility measurements

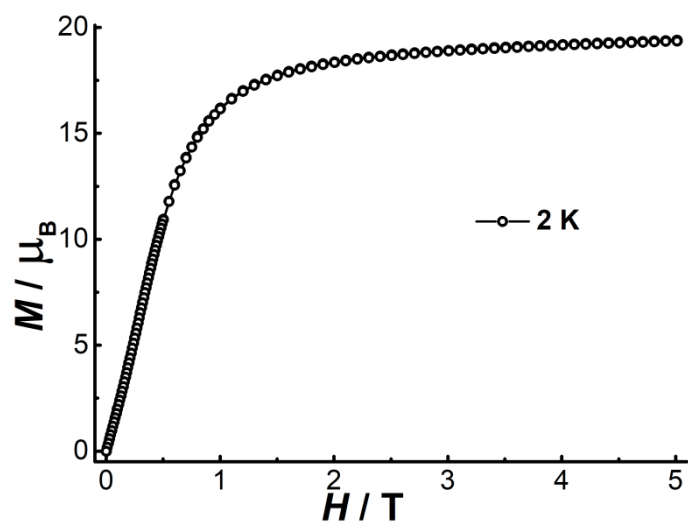

Fig. S13 Molar magnetization ( $M$ ) vs. field ( $H$ ) for  $\text{Dy}_4$  at 2.0 K.

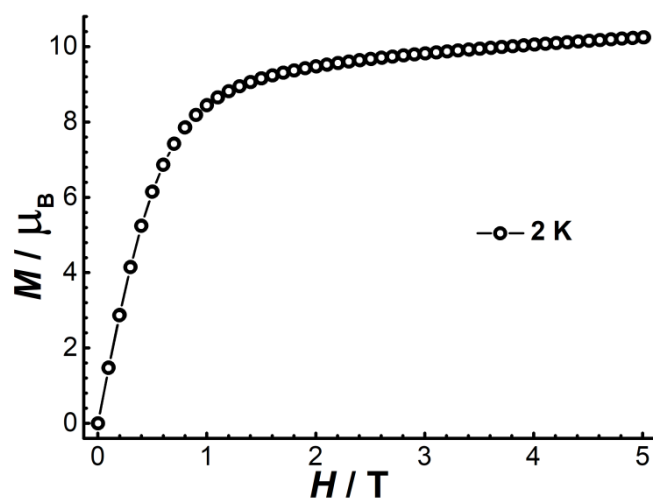

Fig. S14 Molar magnetization ( $M$ ) vs. field ( $H$ ) for  $\text{Dy}_2 \cdot \text{Cl}$  at 2.0 K.

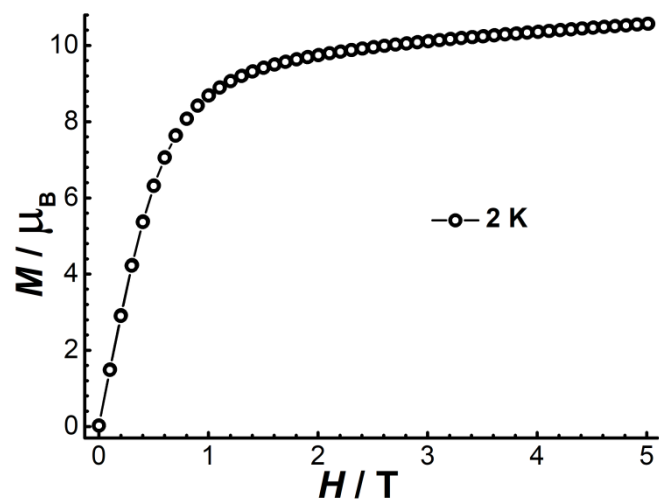

Fig. S15 Molar magnetization ( $M$ ) vs. field ( $H$ ) for  $\text{Dy}_2^* \cdot \text{Cl}$  at 2.0 K.

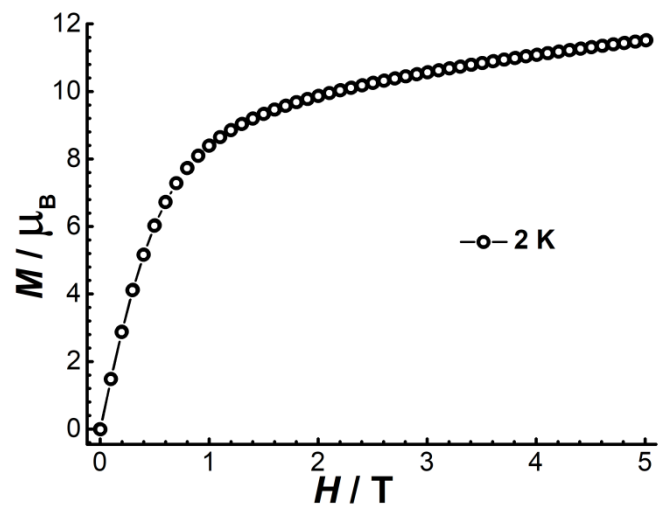

Fig. S16 Molar magnetization ( $M$ ) vs. field ( $H$ ) for  $\text{Dy}_2 \cdot \text{SCN}$  at 2.0 K.

## 6. Alternating current (ac) magnetic susceptibility measurements

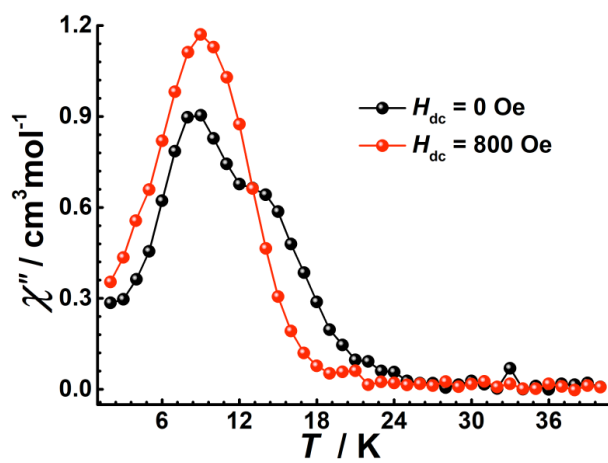

Fig. S17 Temperature-dependent ac susceptibility of  $\text{Dy}_4$  at indicated dc fields with frequency of 1488 Hz.

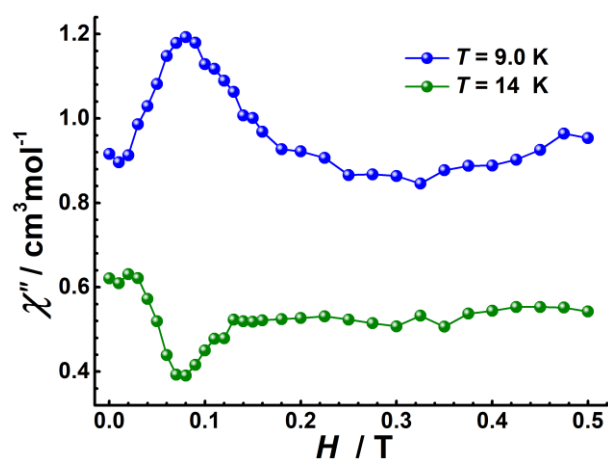

Fig. S18 Field-dependent ac susceptibility of  $\text{Dy}_4$  at indicated temperatures with frequency of 1488 Hz.

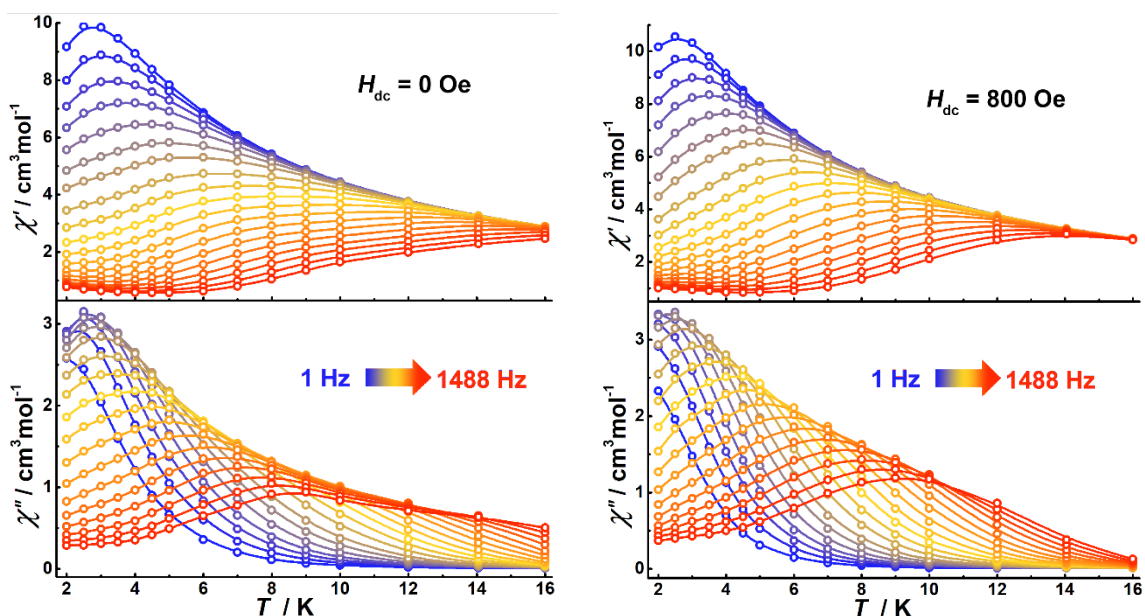

Fig. S19 Temperature-dependent ac susceptibility of  $\text{Dy}_4$  at indicated frequencies under zero (left) and 800 Oe (right) dc field.

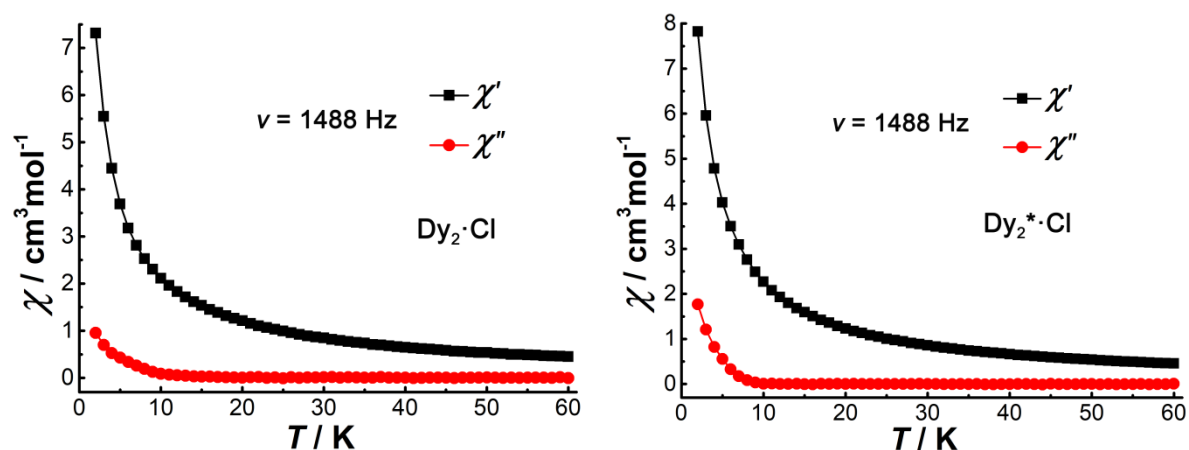

Fig. S20 Temperature-dependent ac susceptibility of  $\text{Dy}_2\cdot\text{Cl}$  (left) and  $\text{Dy}_2^*\cdot\text{Cl}$  (right) at zero dc field with a frequency of 1488 Hz.

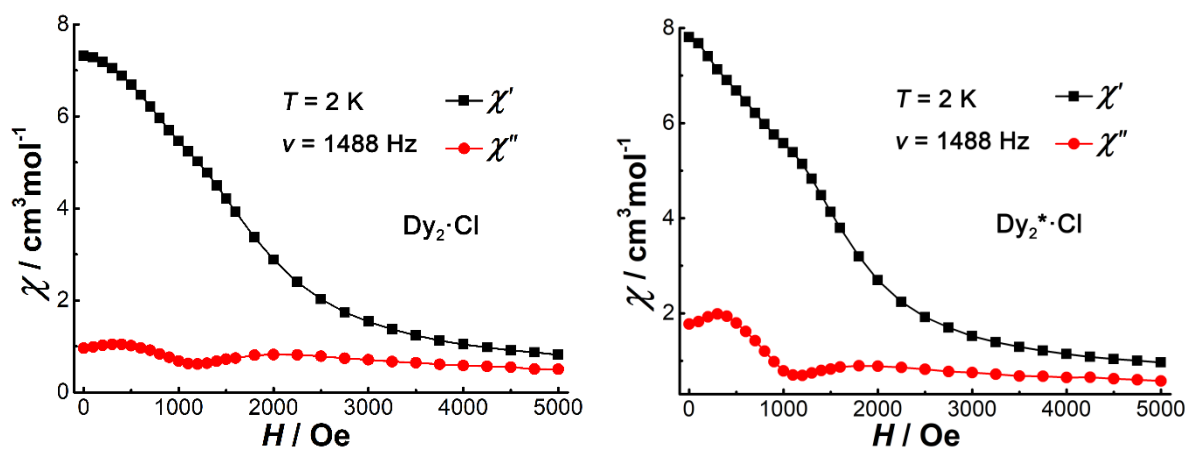

Fig. S21 Field-dependent ac susceptibility of  $\text{Dy}_2\cdot\text{Cl}$  (left) and  $\text{Dy}_2^*\cdot\text{Cl}$  (right) at 2 K with a frequency of 1488 Hz.

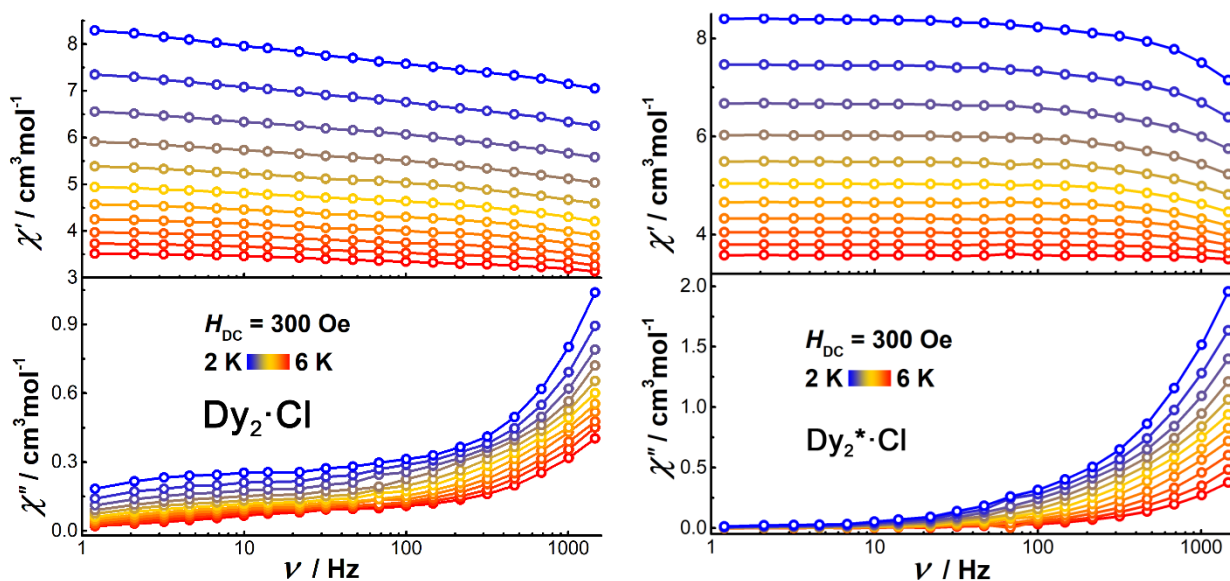

Fig. S22 Frequency-dependent ac susceptibility of  $\text{Dy}_2\cdot\text{Cl}$  (left) and  $\text{Dy}_2^*\cdot\text{Cl}$  (right) at indicated temperatures under 300 Oe dc field.

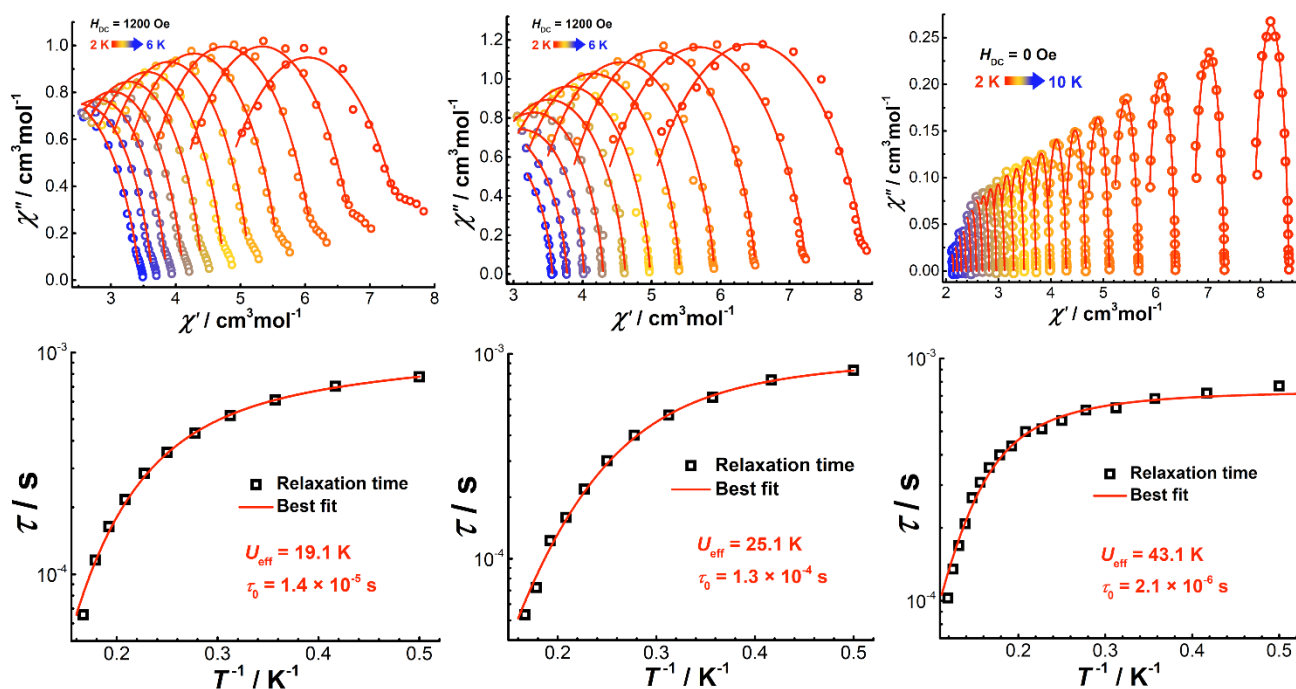

Fig. S23 Cole-Cole plots (top) and plots of  $\tau$  vs.  $T^{-1}$  (bottom) for  $\text{Dy}_2\cdot\text{Cl}$  (left),  $\text{Dy}_2^*\cdot\text{Cl}$  (middle), and  $\text{Dy}_2\cdot\text{SCN}$  (right) under indicated dc field. The red line represents the best fits using equation 1.

## 7. CC-Fit results

Table S9. CC-Fit<sup>2</sup> results for frequency-dependent ac susceptibility of **Dy**<sub>4</sub> under zero dc field.

| <i>T</i> / K | $\chi_{S,tot}$ | $\Delta\chi_1$ | $\tau_1$ / s | $\alpha_1$ | $\Delta\chi_2$ | $\tau_2$ / s | $\alpha_2$ | <i>Residual</i> |
|--------------|----------------|----------------|--------------|------------|----------------|--------------|------------|-----------------|
| 2            | 0.59044        | 8.13929        | 0.01481      | 0.32966    | 2.64099        | 0.09655      | 2.19926E-8 | 0.01591         |
| 2.5          | 0.5123         | 8.08732        | 0.01224      | 0.31826    | 2.93527        | 0.07771      | 3.18221E-8 | 0.00888         |
| 3            | 0.4305         | 8.05426        | 0.01076      | 0.32373    | 2.59776        | 0.05837      | 5.76599E-8 | 0.00764         |
| 3.5          | 0.37351        | 7.74295        | 0.00872      | 0.32463    | 2.23654        | 0.04503      | 1.18424E-7 | 0.00712         |
| 4            | 0.32768        | 7.29461        | 0.0066       | 0.32239    | 1.93835        | 0.03572      | 1.94098E-7 | 0.00725         |
| 4.5          | 0.274          | 6.84936        | 0.00482      | 0.32419    | 1.70276        | 0.02866      | 3.94594E-7 | 0.00647         |
| 5            | 0.22708        | 6.386          | 0.00344      | 0.32719    | 1.5474         | 0.02289      | 7.95211E-7 | 0.00522         |
| 6            | 0.13659        | 5.53512        | 0.00171      | 0.33536    | 1.37677        | 0.01423      | 1.36364E-6 | 0.00559         |
| 7            | 0.11242        | 4.80641        | 9.03371E-4   | 0.34297    | 1.2644         | 0.00879      | 1.63469E-6 | 0.0059          |
| 8            | 0.07596        | 4.23591        | 4.81184E-4   | 0.36112    | 1.1917         | 0.00533      | 2.83498E-6 | 0.00695         |
| 9            | 0.15701        | 3.64447        | 2.70302E-4   | 0.37318    | 1.14825        | 0.00328      | 2.66936E-6 | 0.00912         |
| 10           | 0.5111         | 2.92288        | 1.98751E-4   | 0.35343    | 1.05345        | 0.00212      | 1.89458E-5 | 0.00817         |
| 12           | 0.99713        | 1.94597        | 1.11583E-4   | 0.28187    | 0.84326        | 8.84435E-4   | 2.65224E-5 | 0.00364         |
| 14           | 0.90483        | 1.72157        | 3.72505E-5   | 0.24227    | 0.64899        | 3.7311E-4    | 9.21447E-7 | 0.00178         |
| 16           | 0.97553        | 1.52834        | 2.23824E-5   | 0.14896    | 0.39461        | 1.83002E-4   | 1.00345E-6 | 0.00139         |

Table S10. CC-Fit results for frequency-dependent ac susceptibility of **Dy**<sub>4</sub> under 800 Oe dc field.

| <i>T</i> / K | $\chi_s$ | $\chi_T$ | $\tau$ / s | $\alpha$ | <i>Residual</i> |
|--------------|----------|----------|------------|----------|-----------------|
| 2            | 0.899    | 12.6174  | 0.02894    | 0.34231  | 0.07056         |
| 2.5          | 0.83     | 12.4717  | 0.02089    | 0.33558  | 0.09002         |
| 3            | 0.76931  | 11.6902  | 0.01471    | 0.32453  | 0.12673         |
| 3.5          | 0.72041  | 10.7396  | 0.01018    | 0.31072  | 0.15109         |
| 4            | 0.66365  | 9.8181   | 0.00696    | 0.29754  | 0.16413         |
| 4.5          | 0.61313  | 8.99414  | 0.00478    | 0.28615  | 0.15874         |
| 5            | 0.57009  | 8.2771   | 0.00332    | 0.27714  | 0.15522         |
| 6            | 0.50603  | 7.11298  | 0.0017     | 0.26438  | 0.1403          |
| 7            | 0.49822  | 6.21768  | 9.39959E-4 | 0.25406  | 0.11875         |
| 8            | 0.59089  | 5.51423  | 5.58594E-4 | 0.24155  | 0.09559         |
| 9            | 0.77069  | 4.94512  | 3.47387E-4 | 0.22478  | 0.06007         |
| 10           | 1.00678  | 4.48003  | 2.18822E-4 | 0.20507  | 0.03133         |
| 12           | 1.55972  | 3.77789  | 9.01896E-5 | 0.15865  | 0.00468         |

Table S11. Parameters obtained from the fitting of the relaxation time ( $\tau$ ) vs.  $1/T$  plots of **Dy<sub>4</sub>** under zero and 800 Oe dc field.

| dc Field |    | $U_{\text{eff}} / \text{K}$ | $\tau_0 / \text{s}$ | $\tau_{\text{QTM}} / \text{s}$ | $AH^4$  | C       | n       |
|----------|----|-----------------------------|---------------------|--------------------------------|---------|---------|---------|
| 0 Oe     | SR | 59.21                       | 9.26632E-6          | 0.10666                        | 0       | 0.29684 | 3       |
|          | FR | 48.66                       | 1.08391E-5          | 0.01414                        | 0       | 0.16781 | 4.44712 |
| 800 Oe   |    | 46.01                       | 1.20876E-5          | 0.10134                        | 9.41073 | 0.36298 | 4.01693 |

Table S12. CC-Fit results for frequency-dependent ac susceptibility of **Dy<sub>2</sub>·Cl** under 1200 Oe dc field.

| $T / \text{K}$ | $\chi_S$ | $\chi_T$ | $\tau / \text{s}$ | $\alpha$ | <i>Residual</i> |
|----------------|----------|----------|-------------------|----------|-----------------|
| 6              | 1.1397   | 3.44922  | 6.5531E-5         | 0.27193  | 0.00726         |
| 5.6            | 1.54109  | 3.64313  | 1.15704E-4        | 0.22785  | 0.00742         |
| 5.2            | 1.74555  | 3.86974  | 1.64343E-4        | 0.21238  | 0.00743         |
| 4.8            | 1.93081  | 4.12384  | 2.17445E-4        | 0.20528  | 0.00667         |
| 4.4            | 2.15013  | 4.42094  | 2.84882E-4        | 0.19433  | 0.0069          |
| 4              | 2.36507  | 4.7635   | 3.53657E-4        | 0.19766  | 0.00723         |
| 3.6            | 2.63061  | 5.16303  | 4.31948E-4        | 0.2013   | 0.01003         |
| 3.2            | 2.94591  | 5.62515  | 5.19721E-4        | 0.21235  | 0.01019         |
| 2.8            | 3.33487  | 6.18075  | 6.09794E-4        | 0.23033  | 0.01758         |
| 2.4            | 3.86546  | 6.81802  | 7.03546E-4        | 0.25244  | 0.01993         |
| 2              | 4.47729  | 7.61702  | 7.76157E-4        | 0.31706  | 0.03457         |

Table S13. CC-Fit results for frequency-dependent ac susceptibility of **Dy<sub>2</sub>\*·Cl** under 1200 Oe dc field.

| $T / \text{K}$ | $\chi_S$ | $\chi_T$ | $\tau / \text{s}$ | $\alpha$ | <i>Residual</i> |
|----------------|----------|----------|-------------------|----------|-----------------|
| 6              | 2.13221  | 3.5558   | 5.31887E-5        | 0.11228  | 0.00408         |
| 5.6            | 2.09976  | 3.77139  | 7.23319E-5        | 0.12661  | 0.00344         |
| 5.2            | 2.32506  | 4.01674  | 1.22483E-4        | 0.08761  | 0.01621         |
| 4.8            | 2.30376  | 4.29555  | 1.59001E-4        | 0.11594  | 0.00702         |
| 4.4            | 2.40194  | 4.61804  | 2.18446E-4        | 0.13551  | 0.01218         |
| 4              | 2.61389  | 4.97832  | 3.00672E-4        | 0.13002  | 0.02068         |
| 3.6            | 2.88533  | 5.41094  | 4.00273E-4        | 0.13047  | 0.02073         |
| 3.2            | 3.19282  | 5.91298  | 5.01834E-4        | 0.1421   | 0.04243         |
| 2.8            | 3.61486  | 6.51272  | 6.15237E-4        | 0.14721  | 0.05933         |
| 2.4            | 4.10006  | 7.25575  | 7.44169E-4        | 0.19283  | 0.06518         |
| 2              | 4.75651  | 8.12786  | 8.31683E-4        | 0.22474  | 0.10165         |



Table S14. CC-Fit results for frequency-dependent ac susceptibility of **Dy<sub>2</sub>·SCN** under zero dc field.

| $T / \text{K}$ | $\chi_S$ | $\chi_T$ | $\tau / \text{s}$ | $\alpha$ | <i>Residual</i> |
|----------------|----------|----------|-------------------|----------|-----------------|
| 2              | 7.86539  | 8.5371   | 7.70218E-4        | 0.14204  | 0.00285         |
| 2.4            | 6.71108  | 7.30889  | 7.1906E-4         | 0.14849  | 0.00176         |
| 2.8            | 5.84562  | 6.37441  | 6.82227E-4        | 0.14875  | 0.00103         |
| 3.2            | 5.18467  | 5.67092  | 6.25023E-4        | 0.16672  | 8.58981E-4      |
| 3.6            | 4.67764  | 5.11506  | 6.11415E-4        | 0.17049  | 7.4554E-4       |
| 4              | 4.26489  | 4.66411  | 5.54544E-4        | 0.16664  | 7.58629E-4      |
| 4.4            | 3.92149  | 4.29602  | 5.11631E-4        | 0.16921  | 7.95825E-4      |
| 4.8            | 3.65469  | 3.98292  | 4.98617E-4        | 0.15572  | 5.50063E-4      |
| 5.2            | 3.40823  | 3.71984  | 4.34641E-4        | 0.16145  | 4.80032E-4      |
| 5.6            | 3.20394  | 3.49263  | 3.99466E-4        | 0.16245  | 2.40736E-4      |
| 6              | 3.02766  | 3.29277  | 3.54213E-4        | 0.15223  | 2.10716E-4      |
| 6.4            | 2.87414  | 3.11717  | 3.08067E-4        | 0.1598   | 3.14756E-4      |
| 6.8            | 2.74039  | 2.96045  | 2.66174E-4        | 0.12979  | 2.72768E-4      |
| 7.2            | 2.6145   | 2.82158  | 2.0796E-4         | 0.14973  | 1.8885E-4       |
| 7.6            | 2.48542  | 2.69619  | 1.68795E-4        | 0.19989  | 1.79973E-4      |
| 8              | 2.41214  | 2.58167  | 1.35009E-4        | 0.162    | 1.8817E-4       |
| 8.4            | 2.3207   | 2.47823  | 1.02639E-4        | 0.19051  | 2.40235E-4      |

Table S15. Parameters obtained from the fitting of the relaxation time ( $\tau$ ) vs.  $1/T$  plots of **Dy<sub>2</sub>·Cl**, **Dy<sub>2</sub><sup>\*</sup>·Cl**, and **Dy<sub>2</sub>·SCN**.

|                                      | $U_{\text{eff}} / \text{K}$ | $\tau_0 / \text{s}$ | $\tau_{\text{QTM}} / \text{s}$ | $AH^4$    | C       | n       |
|--------------------------------------|-----------------------------|---------------------|--------------------------------|-----------|---------|---------|
| <b>Dy<sub>2</sub>·Cl</b>             | 19.08                       | 1.37486E-5          | 1.57E-3                        | 321.65034 | 0.00849 | 7.57941 |
| <b>Dy<sub>2</sub><sup>*</sup>·Cl</b> | 25.06                       | 1.30265E-4          | 1.12E-3                        | 121.91791 | 2.49935 | 4.83978 |
| <b>Dy<sub>2</sub>·SCN</b>            | 43.1                        | 2.11156E-6          | 7.34E-4                        | 0         | 5.11551 | 3.07443 |

## 8. Calculations with Magellan program

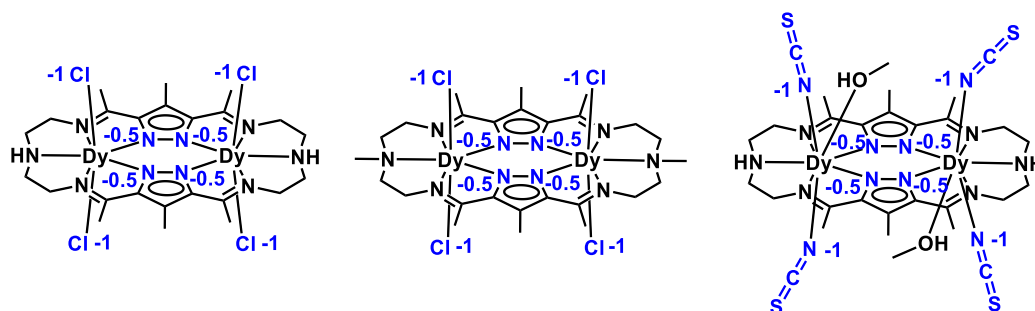

Fig. S24 Partial charges assigned to the ligands in complexes  $\text{Dy}_2 \cdot \text{Cl}$  (left),  $\text{Dy}_2^* \cdot \text{Cl}$  (middle), and  $\text{Dy}_2 \cdot \text{SCN}$  (right) with one negative charge in axial directions.

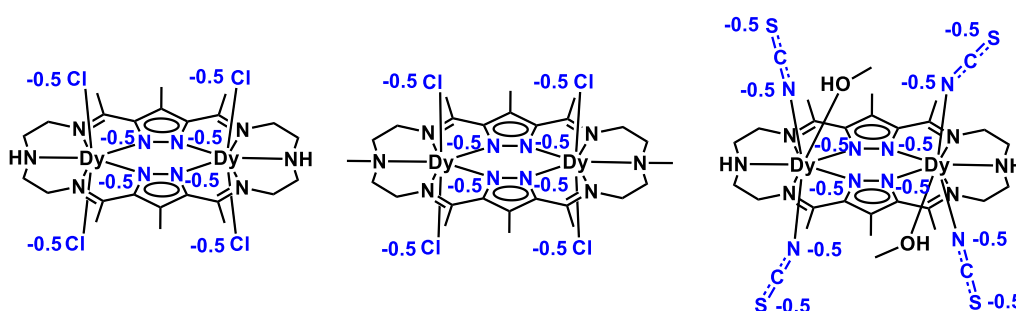

Fig. S25 Partial charges assigned to the ligands in complexes  $\text{Dy}_2 \cdot \text{Cl}$  (left),  $\text{Dy}_2^* \cdot \text{Cl}$  (middle), and  $\text{Dy}_2 \cdot \text{SCN}$  (right) with half negative charge in axial directions.

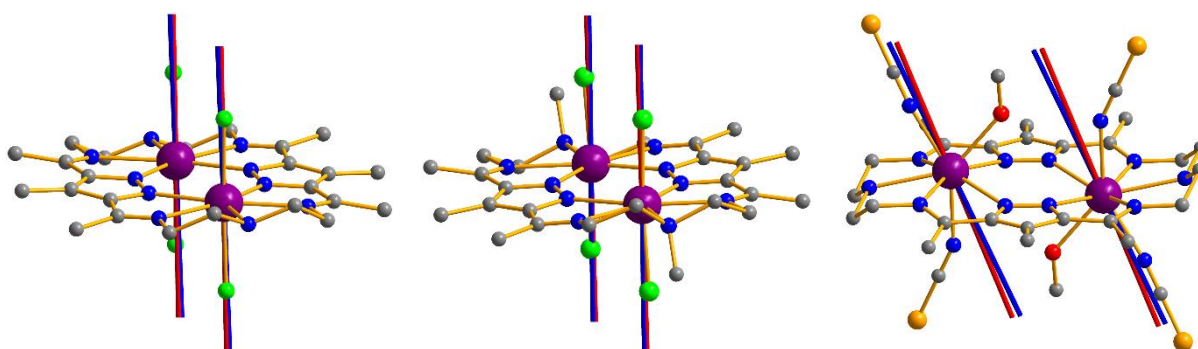

Fig. S26 Orientations of the main magnetic axes and local magnetizations of the ground states for the one (red) and half (blue) negative charge models of the  $\text{Dy}_2 \cdot \text{Cl}$  (left),  $\text{Dy}_2^* \cdot \text{Cl}$  (middle), and  $\text{Dy}_2 \cdot \text{NCS}$  (right).

Table S16. Minimal reorientation energies ( $\text{cm}^{-1}$ ) and intersection angles ( $^\circ$ ) of anisotropy axes calculated from two different models by Magellan program<sup>3</sup> for complexes  $\text{Dy}_2 \cdot \text{Cl}$ ,  $\text{Dy}_2^* \cdot \text{Cl}$ , and  $\text{Dy}_2 \cdot \text{SCN}$ .

|                              | $\text{Dy}_2 \cdot \text{Cl}$ |                               | $\text{Dy}_2^* \cdot \text{Cl}$ |                               | $\text{Dy}_2 \cdot \text{SCN}$ |                               |
|------------------------------|-------------------------------|-------------------------------|---------------------------------|-------------------------------|--------------------------------|-------------------------------|
|                              | Center atom                   | energies ( $\text{cm}^{-1}$ ) | Center atom                     | energies ( $\text{cm}^{-1}$ ) | Center atom                    | energies ( $\text{cm}^{-1}$ ) |
| One charge                   | Dy(1)                         | 884.0                         | Dy(1)                           | 906.8                         | Dy(1)                          | 1217                          |
| Half charge                  | Dy(1)                         | 205.4                         | Dy(1)                           | 223.3                         | Dy(1)                          | 509.4                         |
| Deviation angle ( $^\circ$ ) |                               | 1.082                         |                                 | 0.885                         |                                | 4.497                         |

## 9. References

1. a) D. Casanova, P. Alemany, J. M. Bofill and S. Alvarez, *Chem. Eur. J.*, 2003, **9**, 1281-1295; b) S. Alvarez and M. Llunell, *J. Chem. Soc., Dalton Trans.*, 2000, 3288-3303.
2. D. Reta and N. F. Chilton, *PCCP*, 2019, **21**, 23567-23575.
3. N. F. Chilton, D. Collison, E. J. L. McInnes, R. E. P. Winpenny and A. Soncini, *Nat. Commun.*, 2013, **4**, 2551.
